# Supplementary material for: H5N1 Influenza Virus Pathogenesis in Genetically Diverse Mice Is Mediated at the Level of Viral Load
Source: PubMed Central journal article supplement — mBio. 2011 Sep 6;2(5):e00171-11. doi: 10.1128/mBio.00171-11 (PMC3171982; doi:10.1128/mbio.00171-11), 2011-09-06
Supplement: mbo005111160sf01.pdf [file mbo005111160sf01.pdf]

# Supplemental Figure 1

(A)

Day 1

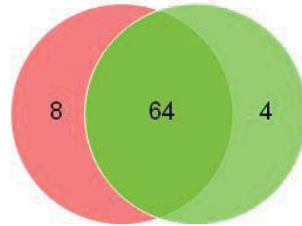

Day 3

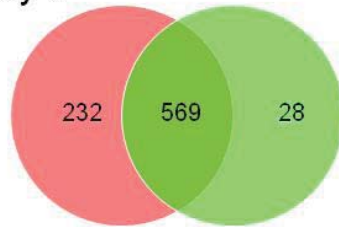

Day 7

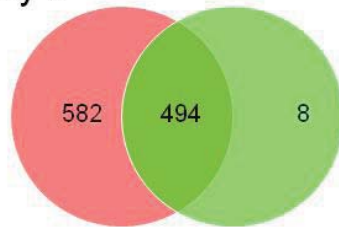

(B)

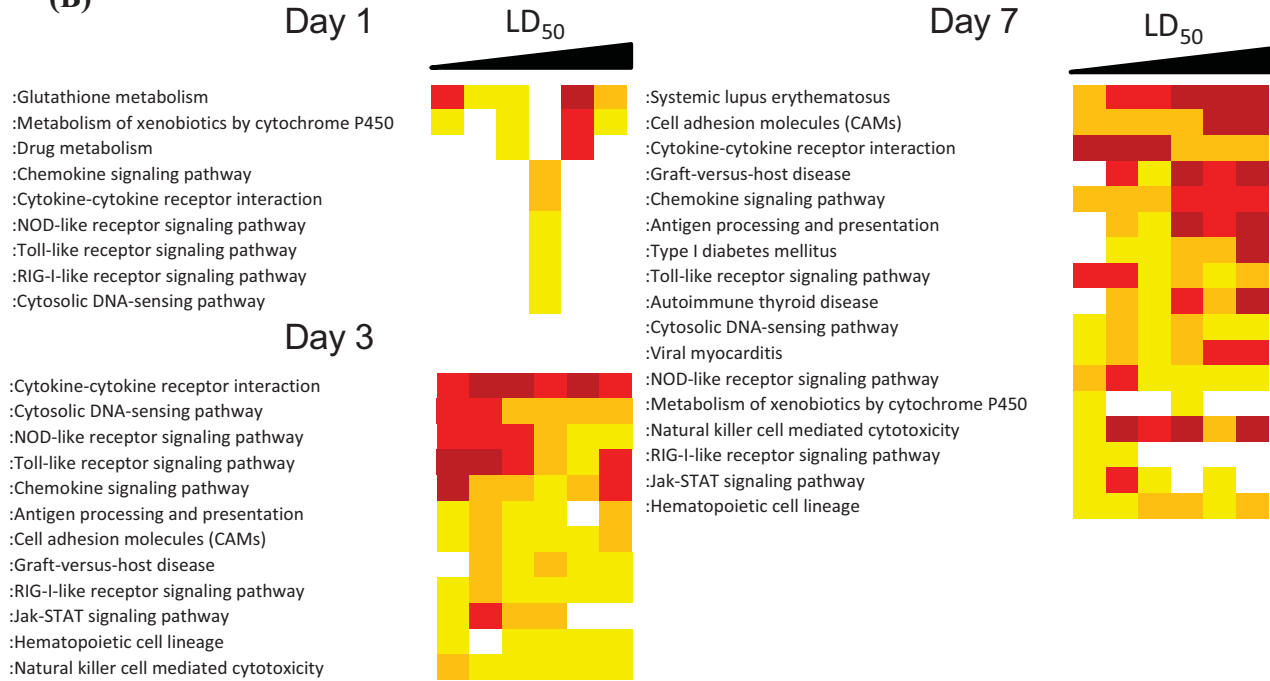

(C)

|                                                |       | DBA/2s | 129SvIm/s | A/J/s | SM <sub>R</sub> | C57BL/6 <sub>R</sub> | Balb/c <sub>R</sub> |
|------------------------------------------------|-------|--------|-----------|-------|-----------------|----------------------|---------------------|
| Cytokine-cytokine receptor Interaction pathway | Day 3 | 55     | 48        | 37    | 30              | 27                   | 36                  |
|                                                | Day 7 | 56     | 59        | 52    | 22              | 32                   | 20                  |
| Toll-like receptor pathway                     | Day 3 | 33     | 29        | 19    | 16              | 12                   | 24                  |
|                                                | Day 7 | 30     | 28        | 21    | 14              | 17                   | 14                  |
| Jak-Stat pathway                               | Day 3 | 34     | 31        | 20    | 18              | 10                   | 18                  |
|                                                | Day 7 | 32     | 34        | 27    | 11              | 16                   | 9                   |
