# Supplementary material for: H5N1 Influenza Virus Pathogenesis in Genetically Diverse Mice Is Mediated at the Level of Viral Load
Source: PubMed Central journal article supplement — mBio. 2011 Sep 6;2(5):e00171-11. doi: 10.1128/mBio.00171-11 (PMC3171982; doi:10.1128/mbio.00171-11), 2011-09-06

Supplemental Figure 2

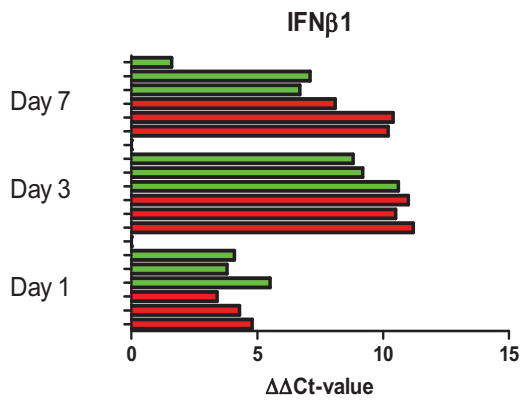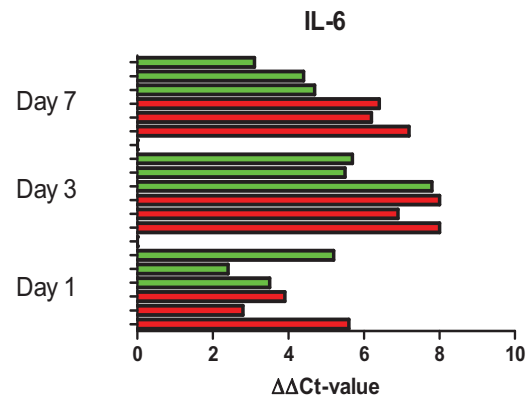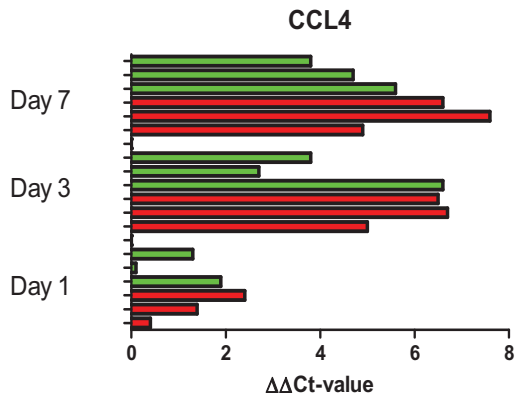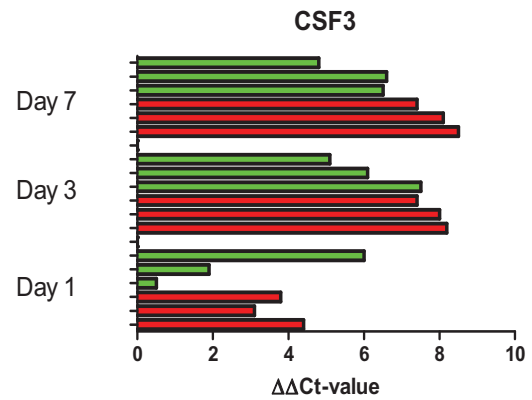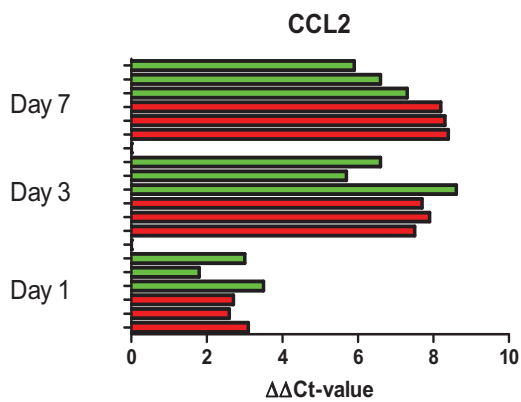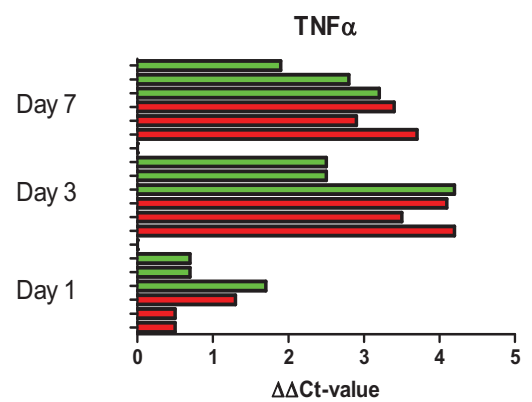

Supplement: mbo005111160sf02.pdf [file mbo005111160sf02.pdf]
