# Supplementary material for: H5N1 Influenza Virus Pathogenesis in Genetically Diverse Mice Is Mediated at the Level of Viral Load
Source: PubMed Central journal article supplement — mBio. 2011 Sep 6;2(5):e00171-11. doi: 10.1128/mBio.00171-11 (PMC3171982; doi:10.1128/mbio.00171-11), 2011-09-06
Supplement: mbo005111160st1.pdf [file mbo005111160st1.pdf]

### Cytokine-Cytokine Receptor interaction pathways genes

Differentially expressed genes (2-fold increase or decrease on day 3 or 7 post inoculation

with highly pathogenic H5N1 influenza A virus). Additional information for Supplemental Figure 1C.

Values represent average fold increase or decrease (log<sub>2</sub>-value). Red indicates a 2-fold increase or decrease in the majority of the samples per strain per time-point

#### Day 3 post Inoculation

| Gene     | DBA/2J | 129SvimJ | A/J | SMM/J | C57BL/6J | Balb/cJ |
|----------|--------|----------|-----|-------|----------|---------|
| Ccl2     | 4.8    | 5.0      | 3.9 | 3.5   | 2.9      | 3.2     |
| Ccl3     | 4.0    | 3.5      | 2.9 | 2.7   | 1.8      | 2.0     |
| Ccl4     | 6.5    | 6.0      | 5.7 | 4.9   | 3.2      | 3.6     |
| Ccl7     | 5.9    | 6.4      | 5.8 | 5.5   | 4.8      | 4.9     |
| CsF1r    | 3.1    | 2.3      | 2.2 | 1.7   | 1.4      | 2.0     |
| Cxcl1    | 5.0    | 5.1      | 4.8 | 3.7   | 3.7      | 4.3     |
| Cxcl10   | 2.4    | 5.6      | 5.9 | 5.2   | 4.1      | 1.4     |
| Cxcl13   | 4.3    | 4.7      | 2.6 | 2.9   | 1.8      | 3.4     |
| Cxcl16   | 1.6    | 1.6      | 1.2 | 1.1   | 1.1      | 1.3     |
| Cxcl5    | 2.3    | 1.9      | 3.8 | 2.1   | 1.6      | 1.7     |
| Cxcl9    | 5.3    | 6.1      | 4.6 | 5.0   | 2.9      | 4.8     |
| Infnb1   | 5.8    | 5.5      | 5.7 | 5.3   | 4.1      | 3.7     |
| Il1b     | 3.1    | 3.1      | 2.9 | 3.2   | 2.0      | 1.7     |
| Osmr     | 2.2    | 1.9      | 1.4 | 1.4   | 1.2      | 1.6     |
| Tnf      | 2.8    | 2.5      | 1.8 | 1.3   | 1.4      | 1.3     |
| Tnfsf13b | 1.7    | 1.5      | 1.1 | 1.4   | 1.2      | 1.6     |
| Xcl1     | 2.6    | 2.8      | 2.1 | 3.0   | 1.3      | 2.1     |
| Ccl5     | 3.1    | 3.3      | 2.6 | 2.1   | 0.6      | 1.0     |
| Csf2     | 1.3    | 1.0      | 1.1 | 0.2   | 1.1      | 1.0     |
| Cxcl2    | 1.5    | 3.3      | 3.2 | 1.5   | 2.1      | 0.3     |
| Il10ra   | 2.1    | 1.7      | 1.4 | 1.4   | 1.0      | 1.7     |
| Il6      | 2.5    | 2.3      | 2.7 | 2.3   | 1.6      | 0.9     |

#### Day 7 post Inoculation

| Gene      | DBA/2J | 129SvimJ | A/J  | SMM/J | C57BL/6J | Balb/cJ |
|-----------|--------|----------|------|-------|----------|---------|
| Ccl2      | 4.6    | 4.8      | 4.4  | 2.4   | 2.3      | 2.2     |
| Ccl3      | 4.0    | 4.4      | 4.5  | 2.5   | 3.5      | 2.7     |
| Ccl4      | 5.1    | 6.7      | 5.8  | 4.6   | 4.7      | 4.3     |
| Ccl5      | 2.1    | 3.9      | 2.9  | 2.2   | 2.7      | 2.2     |
| Ccl7      | 6.8    | 7.1      | 6.6  | 5.3   | 5.6      | 4.8     |
| Ccr5      | 2.7    | 3.5      | 2.9  | 1.6   | 3.0      | 2.7     |
| Cxcl1     | 3.8    | 3.2      | 2.8  | 2.1   | 2.3      | 2.4     |
| Cxcl13    | 3.5    | 5.9      | 4.2  | 3.2   | 4.0      | 3.0     |
| Cxcl16    | 0.8    | 1.4      | 0.7  | 0.8   | 1.5      | 1.4     |
| Cxcl9     | 6.7    | 7.1      | 5.6  | 6.6   | 6.4      | 6.6     |
| Ifng      | 3.6    | 4.3      | 3.9  | 2.0   | 3.0      | 2.2     |
| Il10      | 1.6    | 3.2      | 2.7  | 1.4   | 2.1      | 1.5     |
| il10ra    | 1.5    | 1.7      | 1.2  | 1.4   | 1.5      | 1.3     |
| Il1b      | 1.8    | 2.1      | 2.4  | 1.8   | 2.0      | 1.5     |
| Tnfrsf12a | 2.0    | 2.3      | 2.4  | 1.6   | 1.9      | 1.0     |
| Xcl1      | 2.9    | 3.3      | 3.1  | 2.8   | 2.3      | 2.5     |
| Cxcl10    | 1.3    | 5.9      | 4.4  | 4.2   | 3.0      | 0.4     |
| Cxcr3     | 1.0    | 1.7      | 2.4  | 1.7   | 2.4      | 2.0     |
| Infnb1    | 4.0    | 5.1      | 2.9  | 1.6   | 1.6      | 0.3     |
| Acvr2b    | -1.8   | -1.1     | -1.3 | -1.0  | -1.4     | -0.5    |
| Il12rb1   | 1.4    | 1.7      | 1.9  | 0.7   | 1.7      | 0.8     |
| Il7r      | 1.6    | 1.9      | 1.4  | 1.4   | 1.0      | 0.8     |

**Day 3 post Inoculation**

| Gene      | DBA/2J | 129SvImJ | A/J  | SM/J | C57BL/6J | Balb/cJ |
|-----------|--------|----------|------|------|----------|---------|
| Lif       | 1.8    | 1.7      | 1.4  | 1.1  | 1.0      | 0.9     |
| Tnfrsf12a | 1.2    | 1.6      | 1.4  | 1.7  | 1.1      | 0.9     |
| Csf3r     | 1.7    | 1.3      | 1.3  | 1.1  | 0.3      | 0.4     |
| Csf3r     | 2.3    | 1.8      | 1.4  | 1.7  | 1.0      | 0.9     |
| Infa11    | 2.5    | 2.7      | 1.4  | 1.1  | 0.8      | 0.7     |
| Il15ra    | 1.9    | 1.8      | 1.3  | 1.2  | 0.6      | 1.0     |
| Il18r1    | 0.9    | 1.1      | 1.1  | 1.0  | 1.0      | 1.2     |
| Tnfsf10   | 1.8    | 2.1      | 0.8  | 0.9  | 1.1      | 1.5     |
| Ccl11     | 1.9    | 1.2      | 0.9  | 0.2  | 0.2      | 0.5     |
| Ccl9      | 1.4    | 0.7      | 0.9  | 1.4  | 0.3      | 1.6     |
| Ccr5      | 2.0    | 1.9      | 0.9  | 0.5  | 0.8      | 1.5     |
| Csf2rb2   | 1.6    | 1.3      | 0.9  | 1.1  | 0.6      | 0.9     |
| Il11      | 0.8    | 0.7      | 1.0  | 0.3  | 0.2      | 0.1     |
| Il1r2     | 1.4    | 1.0      | 1.2  | 1.9  | 0.0      | 0.4     |
| Tnfrsf1a  | 1.4    | 1.2      | 0.8  | 0.7  | 0.9      | 1.1     |
| Tnfrsf1b  | 1.4    | 1.4      | 1.0  | 0.8  | 0.6      | 0.8     |
| Amhr2     | -1.0   | -1.0     | -0.5 | -0.8 | -0.5     | -0.5    |
| Ccl21     | -1.6   | -0.9     | -1.0 | -0.9 | -1.0     | -0.8    |
| Ccl25     | -0.2   | -0.2     | -0.2 | -0.2 | -0.6     | -0.9    |
| Csf2ra    | 1.1    | 0.9      | 0.6  | 0.8  | 0.4      | 1.2     |
| Cx3cl1    | 0.2    | 1.2      | 0.1  | -0.1 | 0.6      | 1.0     |
| Ifna4     | 1.5    | 1.3      | 0.9  | 0.5  | 0.6      | 0.2     |
| Ifng      | 0.9    | 1.3      | 0.6  | 0.5  | 0.3      | 0.7     |
| Il13ra1   | 1.1    | 1.2      | 0.5  | 1.0  | 0.4      | 0.9     |
| Il15ra    | 1.2    | 1.0      | 0.4  | 0.5  | 0.2      | 0.5     |
| Il18r1    | 1.2    | 0.4      | 0.1  | -0.1 | -0.1     | 0.2     |
| Il2rg     | 1.0    | 1.3      | 0.8  | 0.9  | 0.2      | 0.9     |
| Ifna5     | 1.7    | 1.0      | 0.9  | 0.2  | 0.5      | 0.1     |

**Day 7 post Inoculation**

| Gene     | DBA/2J | 129SvImJ | A/J  | SM/J | C57BL/6J | Balb/cJ |
|----------|--------|----------|------|------|----------|---------|
| Pdgfa    | -1.6   | -0.9     | -1.1 | -0.6 | -1.0     | -0.3    |
| Tnf      | 1.2    | 2.0      | 1.7  | 0.7  | 1.2      | 1.1     |
| Tnfrsf9  | 1.1    | 1.3      | 1.2  | 0.9  | 1.1      | 0.7     |
| Ccl11    | 1.4    | 2.0      | 1.4  | 1.1  | 1.3      | 0.6     |
| Ccl9     | 1.6    | 1.1      | 1.6  | 0.7  | 1.5      | 0.9     |
| Cd40     | 1.5    | 1.9      | 0.7  | 0.8  | 1.3      | 0.7     |
| Csf1     | 1.9    | 1.6      | 1.5  | 0.6  | 0.9      | 0.8     |
| Csf2ra   | 1.4    | 1.5      | 0.7  | 0.5  | 1.3      | 1.0     |
| Csf2rb2  | 1.2    | 1.7      | 1.0  | 1.1  | 0.6      | 1.2     |
| Cxcl14   | 1.4    | 1.1      | 1.8  | 0.0  | 1.3      | 0.5     |
| Fasl     | 0.4    | 1.5      | 1.9  | 1.1  | 1.0      | 0.9     |
| Il12a    | -1.1   | -1.3     | -1.2 | -0.6 | -1.0     | -0.4    |
| Il15ra   | 1.4    | 1.7      | 1.3  | 0.5  | 0.7      | 0.4     |
| Il1r2    | 2.3    | 1.8      | 1.7  | 0.7  | 0.7      | 0.3     |
| Il24     | 1.3    | 2.1      | 1.8  | 0.9  | 0.7      | 0.4     |
| Il2rg    | 0.7    | 1.4      | 1.2  | 1.0  | 1.4      | 0.9     |
| Il4ra    | 1.4    | 1.5      | 1.6  | 0.1  | 0.7      | 0.3     |
| Osm      | 1.4    | 1.7      | 1.4  | 0.7  | 1.0      | 0.6     |
| Tnfrsf18 | 0.8    | 1.4      | 1.4  | 0.7  | 1.6      | 0.8     |
| Vegfa    | -1.5   | -0.9     | -1.2 | -0.8 | -1.0     | -0.2    |
| Cxcl12   | 0.9    | 1.7      | 1.5  | 0.8  | 1.3      | 0.7     |
| Il11     | 1.4    | 1.2      | 1.8  | 0.5  | 0.4      | 0.2     |
| Il11ra1  | -1.0   | -1.1     | -1.1 | -0.8 | -0.7     | -0.4    |
| Il13ra1  | 1.0    | 1.4      | 1.1  | 0.6  | 0.6      | 0.3     |
| Il15     | 1.5    | 1.8      | 0.9  | 0.6  | 0.5      | 0.6     |
| Il18rap  | 1.2    | 1.1      | 1.2  | 0.7  | 0.9      | 0.6     |
| Il21r    | 0.8    | 1.5      | 1.1  | 0.8  | 1.0      | 0.9     |
| Il6      | 2.1    | 2.0      | 0.9  | 0.6  | 0.4      | 0.2     |

Day 3 post Inoculation

| Gene      | DBA/2J | 129SvImJ | A/J  | SM/J | C57BL/6J | Balb/cJ |
|-----------|--------|----------|------|------|----------|---------|
| Lep       | 0.0    | -1.0     | -1.0 | -0.6 | -0.8     | -0.4    |
| Osmr      | 1.4    | 1.2      | 1.0  | 0.9  | 0.5      | 0.4     |
| Tgfb2     | 1.0    | 1.0      | 0.6  | 0.8  | 0.7      | 1.2     |
| Ccl24     | -0.6   | -0.7     | -0.4 | -0.9 | -1.1     | -0.5    |
| Ccl6      | -0.7   | -1.0     | -1.0 | -0.3 | -0.7     | -0.7    |
| Cd40      | 0.7    | 1.2      | 0.7  | 0.7  | 0.4      | 0.8     |
| Csf1r     | 1.0    | 0.2      | 0.1  | 0.1  | 0.3      | 0.7     |
| Cx3cr1    | 0.7    | 0.2      | 0.0  | 0.2  | 0.9      | 1.2     |
| Cxcl14    | -0.1   | 0.4      | 1.6  | 0.9  | 1.0      | 0.5     |
| Figf      | 1.1    | 0.7      | 0.2  | 0.7  | 0.0      | 0.6     |
| Flt1      | 0.9    | 0.6      | 0.6  | 0.5  | 0.5      | 1.2     |
| Ifnar2    | 1.0    | 0.9      | 0.9  | 0.7  | 0.6      | 1.0     |
| Ifngr1    | 1.2    | 0.6      | -0.2 | 0.3  | 0.3      | 0.4     |
| Ifngr2    | 1.1    | 0.8      | 0.5  | 0.5  | 0.5      | 0.9     |
| Il3ra     | 0.5    | 0.7      | 0.7  | 0.7  | 0.9      | 1.1     |
| Il4ra     | 1.1    | 0.9      | 0.9  | 0.8  | 0.5      | 0.5     |
| Il7r      | 1.8    | -0.1     | 0.2  | 0.9  | -0.3     | 0.1     |
| Kit       | 0.8    | 0.5      | 0.0  | -0.1 | 0.4      | 1.1     |
| Ppbb      | 1.4    | -0.1     | -0.3 | 0.1  | -0.6     | 0.1     |
| Tgfb1     | 1.4    | 0.4      | -0.2 | 0.1  | 0.3      | 0.3     |
| Tnfrsf11a | 0.6    | 0.7      | 0.9  | 0.7  | 0.5      | 1.0     |
| Tnfrsf17  | 0.0    | -0.3     | -0.2 | -0.7 | -1.0     | -0.3    |
| Vegfb     | -1.1   | -0.7     | -0.3 | -0.1 | -0.5     | 0.1     |

Day 7 post Inoculation

| Gene      | DBA/2J | 129SvImJ | A/J  | SM/J | C57BL/6J | Balb/cJ |
|-----------|--------|----------|------|------|----------|---------|
| Kit       | -2.1   | -0.7     | -1.5 | -0.6 | -1.1     | -0.5    |
| Lif       | 1.0    | 1.2      | 0.8  | 0.4  | 0.4      | 0.3     |
| Osmr      | 0.9    | 1.7      | 1.2  | 0.8  | 0.6      | 0.2     |
| Tnfrsf11a | 1.8    | 1.4      | 0.9  | 0.7  | 0.7      | 0.9     |
| Tnfrsf1b  | 1.0    | 1.4      | 1.4  | 0.9  | 0.9      | 1.0     |
| Tnfrsf4   | 0.7    | 1.1      | 0.4  | 1.0  | 2.1      | 0.4     |
| Tnfsf13b  | 0.7    | 1.3      | 0.4  | 0.9  | 0.8      | 1.0     |
| Vegfb     | -1.4   | -1.1     | -1.0 | -0.5 | -0.8     | -0.1    |
| Ccl21     | -0.9   | -0.3     | -0.7 | -0.1 | -0.4     | 0.1     |
| Csf3      | 1.4    | 1.2      | 0.9  | 0.2  | 0.5      | 0.2     |
| Ctf1      | -1.0   | -0.6     | -0.5 | -0.5 | -0.3     | -0.1    |
| Cx3cl1    | -1.1   | 0.1      | -0.7 | -0.5 | -0.5     | -0.1    |
| Cxcl15    | -2.1   | -0.3     | -0.2 | 0.2  | -0.2     | 0.0     |
| Cxcl2     | 0.6    | 2.2      | 1.1  | 0.1  | 0.5      | 0.0     |
| Cxcr6     | 0.3    | 0.7      | 0.7  | 0.7  | 0.5      | 1.0     |
| Ifna11    | 0.2    | 1.3      | 0.1  | 0.1  | 0.1      | 0.0     |
| Ifna4     | 0.1    | 1.1      | 0.1  | 0.0  | 0.0      | 0.0     |
| Il17ra    | 0.7    | 1.0      | 0.9  | 0.2  | 0.5      | 0.4     |
| Il18      | 0.6    | 0.8      | 0.5  | -0.1 | 0.3      | 0.2     |
| Il28ra    | -1.1   | -0.6     | -0.8 | -0.5 | -0.6     | -0.2    |
| Pdgfb     | -1.5   | -0.6     | -0.8 | 0.0  | -0.8     | -0.5    |
| Pdgfd     | -1.1   | -0.1     | -1.0 | 0.0  | -0.6     | -0.4    |
| Tnfrsf19  | -1.1   | -0.5     | -0.9 | -0.4 | -0.7     | -0.5    |
| Tnfsf10   | -0.3   | 0.8      | 0.2  | 0.5  | 0.1      | 0.3     |
| Tnfsf14   | 1.0    | 1.2      | 1.2  | 0.8  | 0.8      | 0.6     |

### Toll-like receptor Pathway

Differentially expressed genes (2-fold increase or decrease on day 3 or 7 post inoculation with highly pathogenic H5N1 influenza A virus). Additional information for Supplemental Figure 1C. Values represent average fold increase or decrease (log<sub>2</sub>-value). Red indicates a 2-fold increase or decrease in the majority of the samples per strain per time-point

| Gene   | <u>Day 3 post Inoculation</u> |          |     |      |          |         | Gene   | <u>Day 7 post Inoculation</u> |          |      |      |          |         |
|--------|-------------------------------|----------|-----|------|----------|---------|--------|-------------------------------|----------|------|------|----------|---------|
|        | DBA/2J                        | 129SvImJ | A/J | SM/J | C57BL/6J | Balb/cJ |        | DBA/2J                        | 129SvImJ | A/J  | SM/J | C57BL/6J | Balb/cJ |
| Ccl3   | 4.0                           | 3.5      | 2.9 | 2.7  | 1.8      | 2.0     | Ccl3   | 4.0                           | 4.4      | 4.5  | 2.5  | 3.5      | 2.7     |
| Ccl4   | 6.5                           | 6.0      | 5.7 | 4.9  | 3.2      | 3.6     | Ccl4   | 5.1                           | 6.7      | 5.8  | 4.6  | 4.7      | 4.3     |
| Cd14   | 1.6                           | 1.4      | 1.3 | 1.5  | 1.1      | 1.9     | Ccl5   | 2.1                           | 3.9      | 2.9  | 2.2  | 2.7      | 2.2     |
| Cxcl10 | 2.4                           | 5.6      | 5.9 | 5.2  | 4.1      | 1.4     | Cd86   | 1.5                           | 2.5      | 1.3  | 1.1  | 1.4      | 1.2     |
| Cxcl9  | 5.3                           | 6.1      | 4.6 | 5.0  | 2.9      | 4.8     | Cxcl9  | 6.7                           | 7.1      | 5.6  | 6.6  | 6.4      | 6.6     |
| Ifnb1  | 5.8                           | 5.5      | 5.7 | 5.3  | 4.1      | 3.7     | Il1b   | 1.8                           | 2.1      | 2.4  | 1.8  | 2.0      | 1.5     |
| Il1b   | 3.1                           | 3.1      | 2.9 | 3.2  | 2.0      | 1.7     | Irf5   | 2.5                           | 2.2      | 2.0  | 1.5  | 1.7      | 1.2     |
| Irf7   | 4.7                           | 5.5      | 5.3 | 5.2  | 3.9      | 4.7     | Irf7   | 4.1                           | 5.2      | 4.4  | 3.4  | 3.5      | 3.0     |
| Stat1  | 2.5                           | 3.0      | 2.0 | 2.3  | 1.8      | 2.5     | Stat1  | 1.2                           | 2.4      | 1.5  | 2.0  | 1.8      | 1.9     |
| Tlr2   | 2.2                           | 1.9      | 1.3 | 1.3  | 1.0      | 1.5     | Tlr2   | 1.8                           | 1.7      | 1.0  | 1.2  | 1.4      | 1.3     |
| Tnf    | 2.8                           | 2.5      | 1.8 | 1.3  | 1.4      | 1.3     | Cd14   | 1.0                           | 2.1      | 1.7  | 1.2  | 1.1      | 1.5     |
| Ccl5   | 3.1                           | 3.3      | 2.6 | 2.1  | 0.6      | 1.0     | Cxcl10 | 1.3                           | 5.9      | 4.4  | 4.2  | 3.0      | 0.4     |
| Il6    | 2.5                           | 2.3      | 2.7 | 2.3  | 1.6      | 0.9     | Ifnb1  | 4.0                           | 5.1      | 2.9  | 1.6  | 1.6      | 0.3     |
| Irf5   | 1.4                           | 1.7      | 1.3 | 1.5  | 0.8      | 1.4     | Myd88  | 2.0                           | 2.1      | 1.8  | 0.8  | 1.5      | 1.1     |
| Myd88  | 2.2                           | 1.6      | 1.5 | 1.1  | 1.0      | 1.1     | Spp1   | 0.1                           | 3.7      | 2.6  | 2.1  | 1.7      | 1.6     |
| Cd86   | 2.1                           | 1.8      | 0.7 | 0.7  | 0.9      | 1.1     | Tlr7   | 1.9                           | 1.8      | 1.3  | 0.8  | 1.4      | 1.0     |
| Ifna11 | 2.5                           | 2.7      | 1.4 | 1.1  | 0.8      | 0.7     | Tnf    | 1.2                           | 2.0      | 1.7  | 0.7  | 1.2      | 1.1     |
| Lbp    | 0.8                           | 1.4      | 1.1 | 0.4  | 1.0      | 1.5     | Cd40   | 1.5                           | 1.9      | 0.7  | 0.8  | 1.3      | 0.7     |
| Map3k8 | 2.0                           | 1.4      | 0.9 | 0.9  | 0.7      | 1.1     | Fos    | 1.3                           | 1.3      | 1.3  | 0.4  | 0.1      | 0.8     |
| Nfkb1  | 0.8                           | 1.0      | 0.8 | 0.7  | 0.6      | 1.2     | Il12a  | -1.1                          | -1.3     | -1.2 | -0.6 | -1.0     | -0.4    |
| Tbk1   | 1.9                           | 1.3      | 0.9 | 0.9  | 0.4      | 1.7     | Ly96   | 1.6                           | 1.0      | 1.3  | 0.5  | 0.9      | 0.8     |
| Casp8  | 1.4                           | 1.2      | 0.3 | 0.4  | 0.2      | 0.7     | Tlr6   | 1.8                           | 1.3      | 0.9  | 0.8  | 1.1      | 0.8     |
| Fos    | 1.8                           | 0.6      | 1.0 | 0.3  | 0.4      | 1.2     | Casp8  | 0.9                           | 1.6      | 1.2  | 0.6  | 1.3      | 0.4     |
| Ifna4  | 1.5                           | 1.3      | 0.9 | 0.5  | 0.6      | 0.2     | Il6    | 2.1                           | 2.0      | 0.9  | 0.6  | 0.4      | 0.2     |

**Day 3 post Inoculation**

| Gene   | DBA/2J | 129SvImJ | A/J | SM/J | C57BL/6J | Balb/cJ |
|--------|--------|----------|-----|------|----------|---------|
| Ifna5  | 1.7    | 1.0      | 0.9 | 0.2  | 0.5      | 0.1     |
| Tlr6   | 1.6    | 1.2      | 0.8 | 0.9  | 0.5      | 0.8     |
| Tlr7   | 1.8    | 1.1      | 1.0 | 1.0  | 0.6      | 0.9     |
| Traf3  | 0.8    | 1.1      | 0.8 | 0.9  | 0.7      | 1.2     |
| Cd40   | 0.7    | 1.2      | 0.7 | 0.7  | 0.4      | 0.8     |
| Fadd   | 0.4    | 0.5      | 0.5 | 0.6  | 0.4      | 1.0     |
| Ifnar2 | 1.0    | 0.9      | 0.9 | 0.7  | 0.6      | 1.0     |
| Ikbkb  | 1.5    | 0.7      | 0.3 | 0.4  | 0.5      | 0.7     |
| Ly96   | 1.4    | 0.2      | 0.5 | 0.6  | -0.3     | 0.3     |
| Map2k2 | 1.6    | 0.7      | 0.2 | 0.2  | 0.5      | 0.5     |
| Map2k4 | 1.1    | 0.5      | 0.5 | 0.4  | 0.3      | 0.5     |
| Mapk9  | 1.0    | 0.7      | 0.3 | 0.6  | 0.4      | 0.8     |
| Pik3cg | 0.9    | 0.3      | 0.0 | 0.4  | -0.1     | 0.3     |
| Ripk1  | 1.0    | 0.7      | 0.3 | 0.4  | 0.4      | 0.7     |
| Ticam1 | 1.0    | 1.0      | 0.6 | 0.7  | 0.8      | 0.9     |
| Tlr3   | 1.1    | 0.9      | 1.0 | 0.7  | 0.4      | 0.7     |

**Day 7 post Inoculation**

| Gene   | DBA/2J | 129SvImJ | A/J  | SM/J | C57BL/6J | Balb/cJ |
|--------|--------|----------|------|------|----------|---------|
| Map3k8 | 1.2    | 1.1      | 0.8  | 0.4  | 0.9      | 0.4     |
| Pik3r3 | -1.7   | -1.2     | -0.8 | -0.4 | -0.6     | -0.3    |
| Ifna11 | 0.2    | 1.3      | 0.1  | 0.1  | 0.1      | 0.0     |
| Ifna4  | 0.1    | 1.1      | 0.1  | 0.0  | 0.0      | 0.0     |
| Mapk12 | -1.1   | -0.7     | -0.7 | -0.5 | -0.7     | -0.4    |
| Mapk3  | -1.1   | -0.8     | -0.7 | -0.4 | -0.8     | -0.5    |
| Nfkbia | 1.1    | 1.2      | 0.8  | -0.2 | 0.4      | 0.6     |
| Pik3cg | 0.9    | 0.8      | 0.6  | 0.7  | 0.8      | 0.8     |
| Tbk1   | 1.2    | 1.0      | 0.5  | 0.0  | 0.8      | 0.7     |
| Traf6  | 1.5    | 1.0      | 0.8  | 0.4  | 0.7      | 0.3     |

### Jak-Stat Pathway

Differentially expressed genes (2-fold increase or decrease on day 3 or 7 post inoculation with highly pathogenic H5N1 influenza A virus). Additional information for Supplemental Figure 1C. Values represent average fold increase or decrease (log<sub>2</sub>-value). Red indicates a 2-fold increase or decrease in the majority of the samples per strain per time-point

| Gene    | <u>Day 3 post Inoculation</u> |          |     |      |          |         | Gene    | <u>Day 7 post Inoculation</u> |          |      |      |          |         |
|---------|-------------------------------|----------|-----|------|----------|---------|---------|-------------------------------|----------|------|------|----------|---------|
|         | DBA/2J                        | 129SvImJ | A/J | SM/J | C57BL/6J | Balb/cJ |         | DBA/2J                        | 129SvImJ | A/J  | SM/J | C57BL/6J | Balb/cJ |
| Ifnb1   | 5.8                           | 5.5      | 5.7 | 5.3  | 4.1      | 3.7     | Ifng    | 3.6                           | 4.3      | 3.9  | 2.0  | 3.0      | 2.2     |
| Irf9    | 2.3                           | 2.4      | 1.7 | 1.8  | 1.5      | 2.1     | Il10    | 1.6                           | 3.2      | 2.7  | 1.4  | 2.1      | 1.5     |
| Osmr    | 2.2                           | 1.9      | 1.4 | 1.4  | 1.2      | 1.6     | Il10ra  | 1.5                           | 1.7      | 1.2  | 1.4  | 1.5      | 1.3     |
| Socs1   | 1.3                           | 1.8      | 1.6 | 1.3  | 0.7      | 1.1     | Socs1   | 1.9                           | 2.5      | 1.6  | 1.4  | 1.4      | 1.2     |
| Socs3   | 3.4                           | 2.6      | 2.1 | 2.2  | 2.1      | 2.0     | Socs3   | 3.1                           | 3.2      | 2.4  | 1.9  | 2.6      | 2.0     |
| Stat1   | 2.5                           | 3.0      | 2.0 | 2.3  | 1.8      | 2.5     | Stat1   | 1.2                           | 2.4      | 1.5  | 2.0  | 1.8      | 1.9     |
| Stat2   | 3.1                           | 3.2      | 2.7 | 2.6  | 2.0      | 2.7     | Stat2   | 1.7                           | 2.7      | 2.0  | 1.5  | 1.6      | 1.3     |
| Ccnd2   | 1.3                           | 1.0      | 1.1 | 0.9  | 0.8      | 1.6     | Ifnb1   | 4.0                           | 5.1      | 2.9  | 1.6  | 1.6      | 0.3     |
| Csf2    | 1.3                           | 1.0      | 1.1 | 0.2  | 1.1      | 1.0     | Ptpn6   | 1.3                           | 1.1      | 1.0  | 1.4  | 1.2      | 1.4     |
| Il10ra  | 2.1                           | 1.7      | 1.4 | 1.4  | 1.0      | 1.7     | Il12rb1 | 1.4                           | 1.7      | 1.9  | 0.7  | 1.7      | 0.8     |
| Il6     | 2.5                           | 2.3      | 2.7 | 2.3  | 1.6      | 0.9     | Il7r    | 1.6                           | 1.9      | 1.4  | 1.4  | 1.0      | 0.8     |
| Lif     | 1.8                           | 1.7      | 1.4 | 1.1  | 1.0      | 0.9     | Irf9    | 1.0                           | 1.9      | 1.6  | 0.9  | 1.1      | 0.8     |
| Spry4   | 1.0                           | 1.4      | 1.1 | 1.5  | 0.6      | 1.3     | Jak1    | -2.1                          | -1.2     | -2.0 | -0.8 | -1.1     | -0.4    |
| Cish    | 1.1                           | 1.3      | 1.1 | 1.3  | 0.8      | 0.9     | Csf2ra  | 1.4                           | 1.5      | 0.7  | 0.5  | 1.3      | 1.0     |
| Csf3    | 1.7                           | 1.3      | 1.3 | 1.1  | 0.3      | 0.4     | Csf2rb2 | 1.2                           | 1.7      | 1.0  | 1.1  | 0.6      | 1.2     |
| Csf3r   | 2.3                           | 1.8      | 1.4 | 1.7  | 1.0      | 0.9     | Il12a   | -1.1                          | -1.3     | -1.2 | -0.6 | -1.0     | -0.4    |
| Ifna11  | 2.5                           | 2.7      | 1.4 | 1.1  | 0.8      | 0.7     | Il15ra  | 1.4                           | 1.7      | 1.3  | 0.5  | 0.7      | 0.4     |
| Il15    | 1.9                           | 1.8      | 1.3 | 1.2  | 0.6      | 1.0     | Il24    | 1.3                           | 2.1      | 1.8  | 0.9  | 0.7      | 0.4     |
| Csf2rb2 | 1.6                           | 1.3      | 0.9 | 1.1  | 0.6      | 0.9     | Il2rg   | 0.7                           | 1.4      | 1.2  | 1.0  | 1.4      | 0.9     |
| Jak2    | 2.4                           | 1.5      | 0.5 | 0.5  | 0.6      | 1.2     | Il4ra   | 1.4                           | 1.5      | 1.6  | 0.1  | 0.7      | 0.3     |
| Stat3   | 0.9                           | 1.0      | 0.8 | 0.9  | 0.7      | 1.3     | Jak2    | 1.5                           | 1.9      | 1.0  | 0.7  | 1.4      | 0.6     |
| Csf2ra  | 1.1                           | 0.9      | 0.6 | 0.8  | 0.4      | 1.2     | Osm     | 1.4                           | 1.7      | 1.4  | 0.7  | 1.0      | 0.6     |
| Ifna4   | 1.5                           | 1.3      | 0.9 | 0.5  | 0.6      | 0.2     | Stat4   | 0.6                           | 0.9      | 1.4  | 1.1  | 1.3      | 1.0     |
| Ifna5   | 1.7                           | 1.0      | 0.9 | 0.2  | 0.5      | 0.1     | Il11    | 1.4                           | 1.2      | 1.8  | 0.5  | 0.4      | 0.2     |

**Day 3 post Inoculation**

| Gene    | DBA/2J | 129SvImJ | A/J  | SM/J | C57BL/6J | Balb/cJ |
|---------|--------|----------|------|------|----------|---------|
| Ifng    | 0.9    | 1.3      | 0.6  | 0.5  | 0.3      | 0.7     |
| Il13ra1 | 1.1    | 1.2      | 0.5  | 1.0  | 0.4      | 0.9     |
| Il15ra  | 1.2    | 1.0      | 0.4  | 0.5  | 0.2      | 0.5     |
| Il28b   | 2.0    | 2.0      | 1.0  | 0.5  | 0.6      | 0.4     |
| Il2rg   | 1.0    | 1.3      | 0.8  | 0.9  | 0.2      | 0.9     |
| Lep     | 0.0    | -1.0     | -1.0 | -0.6 | -0.8     | -0.4    |
| Osm     | 1.4    | 1.2      | 1.0  | 0.9  | 0.5      | 0.4     |
| Ifnar2  | 1.0    | 0.9      | 0.9  | 0.7  | 0.6      | 1.0     |
| Ifngr1  | 1.2    | 0.6      | -0.2 | 0.3  | 0.3      | 0.4     |
| Ifngr2  | 1.1    | 0.8      | 0.5  | 0.5  | 0.5      | 0.9     |
| Il11    | 0.8    | 0.7      | 1.0  | 0.3  | 0.2      | 0.1     |
| Il12a   | -1.0   | -1.0     | -0.5 | -0.8 | -0.3     | 0.0     |
| Il3ra   | 0.5    | 0.7      | 0.7  | 0.7  | 0.9      | 1.1     |
| Il4ra   | 1.1    | 0.9      | 0.9  | 0.8  | 0.5      | 0.5     |
| Il7r    | 1.8    | -0.1     | 0.2  | 0.9  | -0.3     | 0.1     |
| Pik3cg  | 0.9    | 0.3      | 0.0  | 0.4  | -0.1     | 0.3     |
| Ptpn6   | 1.1    | 1.0      | 0.9  | 0.9  | 0.5      | 0.8     |
| Socs2   | 0.5    | 0.2      | -0.3 | 0.0  | -0.5     | 1.3     |

**Day 7 post Inoculation**

| Gene    | DBA/2J | 129SvImJ | A/J  | SM/J | C57BL/6J | Balb/cJ |
|---------|--------|----------|------|------|----------|---------|
| Il11ra1 | -1.0   | -1.1     | -1.1 | -0.8 | -0.7     | -0.4    |
| Il13ra1 | 1.0    | 1.4      | 1.1  | 0.6  | 0.6      | 0.3     |
| Il15    | 1.5    | 1.8      | 0.9  | 0.6  | 0.5      | 0.6     |
| Il21r   | 0.8    | 1.5      | 1.1  | 0.8  | 1.0      | 0.9     |
| Il6     | 2.1    | 2.0      | 0.9  | 0.6  | 0.4      | 0.2     |
| Lif     | 1.0    | 1.2      | 0.8  | 0.4  | 0.4      | 0.3     |
| Osmr    | 0.9    | 1.7      | 1.2  | 0.8  | 0.6      | 0.2     |
| Pias1   | -1.2   | -0.8     | -1.2 | -0.4 | -0.9     | -0.5    |
| Pik3r3  | -1.7   | -1.2     | -0.8 | -0.4 | -0.6     | -0.3    |
| Stat3   | 1.0    | 1.0      | 0.9  | 0.6  | 0.7      | 0.8     |
| Crebbp  | 0.4    | 1.2      | 0.1  | -0.1 | -0.2     | 0.4     |
| Csf3    | 1.4    | 1.2      | 0.9  | 0.2  | 0.5      | 0.2     |
| Ifna11  | 0.2    | 1.3      | 0.1  | 0.1  | 0.1      | 0.0     |
| Ifna4   | 0.1    | 1.1      | 0.1  | 0.0  | 0.0      | 0.0     |
| Il28b   | 0.7    | 1.5      | 0.1  | -0.1 | 0.0      | 0.1     |
| Il28ra  | -1.1   | -0.6     | -0.8 | -0.5 | -0.6     | -0.2    |
| Pik3cg  | 0.9    | 0.8      | 0.6  | 0.7  | 0.8      | 0.8     |
| Pim1    | 1.0    | 1.5      | 0.6  | 0.5  | 0.8      | 0.7     |
