# Supplementary material for: H5N1 Influenza Virus Pathogenesis in Genetically Diverse Mice Is Mediated at the Level of Viral Load
Source: PubMed Central journal article supplement — mBio. 2011 Sep 6;2(5):e00171-11. doi: 10.1128/mBio.00171-11 (PMC3171982; doi:10.1128/mbio.00171-11), 2011-09-06
Supplement: mbo005111160st2.pdf [file mbo005111160st2.pdf]

**Names of genes whose expression values match PCA clusters**

Multivariate analysis was used to identify the genes whose expression values were significantly different (FDR  $P < 0.01$ ) between group 1 (DBA/2 and 129SvIm), group 2 (A/J and SM) and group 3 (C57BL/6 and Balb/c) on day 3 and between the resistant (SM, C57BL/6 and Balb/c) and susceptible (DBA/2, 129SvIm, A/J) strains on day 7

**Gene**

|          |           |
|----------|-----------|
| Adamts4  | Irf5      |
| Adm      | Irg1      |
| Al607873 | Isg15     |
| Alox5ap  | Kif26b    |
| Apol6    | Lif       |
| Atp2a3   | Lilrb4    |
| Bex2     | Lrp8      |
| Ccdc86   | Ly6c1     |
| Ccl2     | March5    |
| Ccl3     | Mt2       |
| Ccl4     | Mx1       |
| Ccl7     | Mxd1      |
| CD274    | Naa25     |
| Cd300lf  | Ngef      |
| Cdkn1a   | Noxo1     |
| Cebpb    | Nrn1      |
| Clec4e   | Oasl1     |
| Cmpk2    | Pira2     |
| Csf2     | Pira3     |
| Csf3     | Pla1a     |
| Csnk1d   | Plaur     |
| Ctsf     | Plunc     |
| Daxx     | Pstpip1   |
| Ddo      | Ptpro     |
| Dhx58    | Ptx3      |
| Dpep2    | Riok3     |
| Enc1     | Rnf19b    |
| Fam107a  | Rsad2     |
| Fst      | Sap30     |
| Gadd45g  | Slc39a14  |
| Gm14085  | Slfm2     |
| Gng12    | Snhg12    |
| Gp49a    | Srgn      |
| Gpr35    | Tlr13     |
| Gpt1     | Tnfrsf12a |
| Guk1     | Tor3a     |
| Hmga1    | Trafd1    |
| Iffit2   | Trex1     |
| Ifnb1    | Tspo      |
| Il15ra   | Ttc39b    |
| Il18     | Upp1      |
| Il1r2    | Vcan      |
| Il6      |           |
